**The sequence of the gene for cytochrome *c* oxidase subunit I, a frameshift containing gene for cytochrome *c* oxidase subunit II and seven unassigned reading frames in *Trypanosoma brucei* mitochondrial maxi-circle DNA**

Lambert A.M.Hensgens<sup>+</sup>, Just Brakenhoff, Berend F.De Vries, Paul Sloof, Marijke C.Tromp\*, Jacques H.Van Boom\* and Rob Benne<sup>§</sup>

Section for Gene Structure and Expression, Laboratory of Biochemistry, University of Amsterdam, P.O. Box 60.000, 1005 GA Amsterdam, and \*Organic Chemistry Laboratory, Gorlaeus Laboratories, P.O.Box 9502, 2300 RA Leiden, The Netherlands

Received 30 July 1984; Accepted 13 September 1984

**ABSTRACT**

A 9.2 kb segment of the maxi-circle of *Trypanosoma brucei* mitochondrial DNA contains the genes for cytochrome *c* oxidase subunits I and II (coxI and coxII) and seven Unassigned Reading Frames ("URFs").

The genes for coxI and coxII display considerable homology at the aminoacid level (38 and 25%, respectively) to the corresponding genes in fungal and mammalian mtDNA, the only striking point of divergence being an unusually high cysteine content (about 4.5%). The reading frame coding for cytochrome *c* oxidase subunit II is discontinuous: the C-terminal portion of about 40 aminoacids, is present in the DNA-sequence in a -1 reading frame with respect to the N-terminal moiety.

URF5, 8 and 10, show a low but distinct homology (about 20%) to mammalian mitochondrial URF-1, 4 and 5, respectively. In URF5, the first AUG is found at codon 145, whereas extensive homology to mammalian URF-1 sequences occurs upstream of this position. The possibility exists that UUG can serve as an initiator codon.

URF7 and URF9 have a highly unusual aminoacid composition and do not possess AUG or UUG initiator codons. These URFs probably do not have a protein-coding function.

The segment does not contain conventional tRNA genes.

**INTRODUCTION**

Mitochondrial DNA (mtDNA) in trypanosomes possesses a highly unusual structure that is unique in nature (for reviews see refs 1-4). In *T. brucei* it consists of a catenated network of two types of circles,  $10^4$  mini-circles of 1 kb and  $10^2$  maxi-circles of about 20 kb. The maxi-circle contains a number of genes found in the mtDNA of other organisms (5-10) and, therefore, can be regarded as the trypanosomal equivalent of these DNAs. The role of the mini-circles is unknown. We have undertaken nucleotide sequence analysis of the maxi-circle of *Trypanosoma brucei* mtDNA, in an attempt to further identify the mitochondrial genes and to study their organization and mode of expression.

To date, we have reported the sequence analysis of maxi-circle segments containing the genes for the mitochondrial ribosomal RNAs of 12S

and 9S (6), for apocytochrome b and a number of unusual URFs (7,10). A common feature of these genes is their low degree of conservation when compared to other organisms. The ribosomal RNAs show hardly any direct homology to the ribosomal RNAs of E. coli or other mitochondria (6), although certain aspects of a possible secondary structure are reminiscent of the conserved secondary structural domains of E. coli rRNA as envisaged in refs. 11 and 12. The mitochondrial protein-coding genes also appear to conform to this pattern (7,10). The gene for apocytochrome b is only 25% homologous at the aminoacid level to its mammalian counterpart, whereas the yeast and mammalian apocytochrome b genes are about 45% homologous, indicating a larger evolutionary distance between mammalian and trypanosome mitochondria than between mammalian and yeast mitochondria.

The maxi-circle also contains long open reading frames without an AUG codon in the N-terminal moiety (see ref. 7). These occur in areas which are abundantly transcribed, but the aminoacid composition of the proteins they encode is highly unusual. This makes assessment of their role somewhat problematic. As yet, no conventional tRNA genes have been found.

In this report we present the sequence of a 9.2 kb segment on which two familiar mitochondrial protein genes (the genes for cytochrome c oxidase subunit I and II, coxI and coxII) and a number of URFs are localized. Some aspects of the trypanosomal mitochondrial genes and their organization are discussed in more detail, now that about 70% of the maxi-circle has been sequenced.

## MATERIALS AND METHODS

### Materials

Restriction endonucleases were from New England Biolabs or Boehringer Mannheim; DNA polymerase (large fragment), calf intestine phosphatase and T4 DNA ligase from Boehringer Mannheim; Exonuclease Bal-31 from New England Biolabs or Bethesda Laboratories; low melting agarose from Bethesda Research Laboratories; S<sub>1</sub> nuclease from Sigma.

### DNA and assays

The isolation of trypanosome mtDNA (T. brucei 427, culture and bloodstream form) was performed as described in ref. 5. DNA was stored at -20°C as an ethanol precipitate. Plasmid DNA and M13 RF DNA were isolated according to Birnboim and Doly (13).

Restriction enzyme digestion, agarose gel electrophoresis, blot analysis of DNA fragments, nick translation and hybridization was performed as in refs 5-7. Bal-31 digestion was performed at 30°C for varying periods of time; routinely 0.5 U of Bal-31 was used per µg of DNA. Incubations were stopped by the addition of phenol.

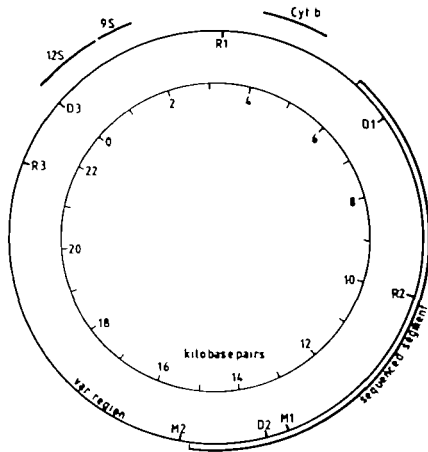

**Figure 1**  
Partial map of *T. brucei* 427 maxi-circle DNA. The position of the 12S and 9S rRNA genes (6), the apocytochrome *b* gene (cyt.*b*) (7) and the variable region (var.region) is indicated together with that of a few relevant restriction sites (5), (R = EcoRI, D = HindIII, M = MboII) and the area of which the sequence is reported in this paper.

#### Cloning in M13 and sequence analysis

Four restriction fragments of bloodstream form *T. brucei* 427 maxi-circle were cloned in M13 mp8 and mp9:  $R_1-D_1$ ,  $D_1-R_2$ ,  $R_2-D_2$  and  $M_1-M_2$ . Fig. 1 shows the position of these fragments relative to the position of the genes for the rRNAs, the gene for apocytochrome *b* and the region which varies in size in closely related *T. brucei* stocks (variable region, 14). The  $M_1-M_2$  fragment was cloned in the HindII site of mp9 after blunt-ending the MboII sites with DNA polymerase I, large fragment. The nucleotide sequence of the fragments was determined using non-random cloning procedures with the use of exonuclease Bal-31 as described by Poncz et al. (15).

In a previous report we have given a detailed description of the use of this method in the sequence analysis of part of the  $R_1-D_1$  segment (7). The procedure yields a large series of nested fragments in two orientations, with the part progressively shortened by Bal-31 oriented towards the vector's priming site. Some parts of the sequence were verified with the use of M13 recombinant DNA from clonebanks derived from maxi-circle DNA restricted with MboI, AluI or MboII, cloned in the BamHI site of M13 mp9 (MboI fragments) or the HindII site of this vector (AluI and blunted MboII fragments). Phage DNA obtained from these banks was also used to sequence across the  $D_1$ ,  $R_2$  and  $D_2$  sites. Whenever a certain area could not be sequenced without ambiguity with clones from the Bal-31 and restriction enzyme banks, sequences were obtained with the use of synthetic oligonucleotides (prepared as in ref.16). These were utilized to prime complementary strand synthesis on M13 DNA with large maxi-circle inserts ( $R_1-D_1$ ,  $D_1-R_2$  etc.). In areas of special interest (see figs. 4 and 5) this approach was followed to thoroughly check the obtained sequences of bloodstream-form maxi-circle DNA and to compare them with the nucleotide sequence of culture-form maxi-circle DNA, which was cloned as a EcoRI x HindIII digest in M13 mp8 and mp9. The colinearity of the cloned M13 inserts with maxi-circle DNA was checked with  $S_1$  nuclease analysis, as described in ref. 15.

DNA sequence analysis was carried out by the dideoxy nucleotide chain-termination technique according to the method of Sanger et al. (17). All DNA fragments were completely sequenced in both directions. The nature of the procedures followed, provides an ample source of overlapping clones. Each part of the sequence is derived from at least two



```

5901 ATTAATGTAG TCTTAATAAT AATATTAGAT GATTTTATGT GTTTTATGAT AGCCTTCGAA ACTCTATTTT TCCCTATATG TCTAGTAAGT TTATTTTTTA
6001 ATTTTAATAA TAGATTTTAT TTGCTATAT TCTATCTTAT AATATTTAGT TCAGTTACTT CAGCTGCTATG TATAAATATA TGTATAATAG TAATATCTCA
6101 TTTCAACATT ATAAATTTAC AGGCTTTTAT TGATCTATGT TAITTTTGATA GTTTGTATTC GGCALATTTT ATATGAATAT TAITTTTAT AATGTTCOCT
6201 ATAAAATACC CAATCTGACC ATTCOCATGT TGACTACCAG AGATCCATGT AGACCTAAAT ACAGAAATTTA GTCITTTTTT AGCAAGTATT GTGCTGAAAA
6301 TAGGTTTTTT TGTGTATAC AAATTTTTAT TTATGCGATT TAATACGATA TCAATATGAT TTTTAGGTTT TATAGATAGT GTAATTCGTG TGGCTTAGCT
6401 ATTTATAGCA ATGTCACTAA TAITTTTTAT AGACTACACG AAAATAATAG CGAATTGATC AATAATACAC ACCGGTATAG GATTAATATT ATTATGCAGT
6501 AATGCACATT TGTTTGTAGT TTACTATAAT TTATGTAATC TAGCACATAT ACTAAGTTCA TCCTTTATGT TTATTTTAAT AGGATATATG TAGCACAAAT
6601 ATGCTGTAAG AATTTTTTTA TTGTTAAITT CATTTTTTGG TATTACTATA TGAAGTTCAAT TGTTTTTATG TTTATTTTTA TTTAATATAG ATTTCCCGCT
6701 TATGTTATTA TTTTATGTAG ATATATTTAT TTTGATGCTG TTGATATCTA TATCATTTAT ATATATAATA AGTTTTTATA TAATAACTTT AACGATATT
6801 TTATCATCAA TATACATCTA TATGTTTATA AGTTTTTAT CATTGCTATG GTTGGATAAA TATCTTAGAC TTGATGTTAG TATAAATGAT ATATATGAT
    |<--- End URF9 --->|
6901 TTATGCTCAAT ATCAATATCA ACTATAGTAT TTTATTAITT TATATATTTA TTAATATAAT ATGTATAATA CAACAANCAA ATCTCTTTAC CCCCCTCACT
7001 GATCCCTCCC CATCAAAACT TCTCCCCCGA AAACCATCAT CCCATTCCAC CCAAACTCAT GGTTTTCTCA CACTGCTCAT CCTGCTCACA CCGTGTATCT
7101 TCTCAACCCC CCCCCTCCCT CTGCTCTCTC CTTTTAAAT CCCTAATACA CTTTTGATAA CAAACTAAGG TAAAAAGGGC AGGATTTTTT GACTGGCACT
7201 GGAGACAAGG AGCCGTTGCA GCCCAGCCGG AACCCAGCGA GACCTTCTTT TGAATAAAGG GGAGGCCGGG AGAGAGATTT CAABAAGATT TGGCTGGGGC
7301 GAACCCCTTG TTTTGCTTAA AGAAACATCC TTTAGAAAGC ATTTTAGAAT AGATATGTT TTTAATATT TTTTTATTTT TTATAATGTT TGGGTTTTTA
7401 TCAAGTTCAAT TTATGTTTGG TAGGAAATTT CTAAGTTTTT GATTAATCTT AGTAATGATA ATATTTAATG TATTTGCTAT GATATTTAGT TTTTAAATGG
7501 TATCAGTATG TTATACGCTT TAITTATTAT AGCATTTTTG TTAATACTA ATCTTAGATT TTTGTTTTAT ATGATTAAGA TACGATGCTT CAGGTTTTTA
7601 TATGTTTATA ATGTTATGTA TAAATATGCT ATTTTGTITT ATAGTATTTT ACCGATTTTA TTATATGCTAT TTTGATATGT TGTTAGGGCC TTTTTTGATT
7701 ATATTTTCAA TAITTTTCTG CTGCATGAAT TTATTCATCC TATCATATGA TTTTTTAACA CCTTACTCGG GATGAGAAAT ATTAGGGCTA TTCTCATTTT
7801 TTTTAAITTC ATATTCTGA TACCCTTTTT TTGCATTAAT ATTTGGTTTT TTATAGCTAA AATAGGAGAT CTTGTTTAAA TATTTGCTTT
7901 TTCTATAATA TTTTTTCAA ATGCTTTTTG TATGACAAC TTTTATTTTT TAAATTTTTT TTGATGGAT TATTATI ATA TAGAATTTTC TATATGTTTC
8001 TTAGTAGGAT GTCCGTTTAC AAAAAGTACA CAATTCDDCT TACATATATG ATTACAGAT OCTATGGAAG TACTATCCC AGTATCAGCA TTAATACACC
8101 CAGTACATAT AGTCTGTTTG GGAATAATAT TAITTAAGTTT TGTTTATGTA TGTTTTGATT TTGATTTAG CTTTTTTTAT AAITTGATAG GATGCTCTAC
8201 ATTAATTTTA ATATAATGA CATTGTGTGT TTGTTTAAAT TTTGAGCTAA AACGATACGT AGCGTTCACT ACAATATGTC AAATTAGCTT TTCTATGTTT
8301 TGTTCCTCTG GTATAGATAT ATATATAGGT AGTTTTTTTT TTGTTAGCA TATGTTCTAC AAAGCAACAT TATTTATAGT ATTAGCTATA TGAATACATA
8401 TAITTTTTGG GTTACAGGAT TTAAGATGTT ATTTTTTAT GTATTTTTGT GCTTGTGTGT TAGCCCGCTT GTTATTAATA TTCCGAATAT TAAACTCTG
8501 TTCAAITTTA TTTTATCTG GTTTTTATTC TAAGGATATG TTATTAAGCTT TAITGATGTT ATATTCATT TATAATATAA TAGAATTTTT GTTTATAAGT
8601 ATAAITTTTA TAITTTTTAC AATGATTTAT AAITTTTTTT TGTATTTTTT TTTGATGTTT GTGTTCAAAT GTTTTTGTTT GCTTGTATCT TTATTTTTAT
8701 TAITTTGATTA TGAATCTGTT TTAGTATATT GTTTGATAAG TTTGTATATG TGTATTTTAA GTATATTTTT TATAATAGAT TTTGTATCTA TAITTTGATT
8801 TTCAGTTTAT TGTGTATTTT GATCATTTTT TTTAAATTTT TATAATTTTT TTGATATAGC AATTTTTCTG GTTTTTTTAA TAITATCACT AGCAATTTTA
8901 TAITATGCTT GTTATTTTTT TTATTTTTTC AATATAGATT GCATAATGTT GTTTTGAGA ATTTTTTTTT TAAATAAAT TTTACTAGTA TTTATGATAT
9001 TTTGTTCTG ATATTTCTT TCTATGATCA TATTTATGTT ATTAITTTCTA TGAAAATTTG TTATATATTT TAGATATAAT TTGAAATATT GTTATTTTTT
    |<--- End URF10 --->|
9101 TTTGATTTTC TCAATATTTG ATGTATAAAT AGTATAATCA AAAGTAAAAA AAGTAAAGAA ACCAGATTAG ATTTGTAAAA AAGTCAAAAT ATTTTATAAT

```

Figure 2

Nucleotide sequence of a 9.2 kb maxi-circle segment of *T. brucei*. First and last nucleotide of a number of protein genes and URFs has been indicated (see also Table 1). The sequence strategy has been described under methods. Nucleotide number 1 corresponds to nucleotide 2501 in ref. 7. Genes were identified by comparison with aminoacid sequences of human (18) and yeast (19-26) mitochondrial proteins.

independent clones in each direction. In a previous paper the sequence of the first 2520 nucleotides of the R<sub>1</sub>-D<sub>1</sub> fragment was reported (7). The present paper provides the sequence of the remainder of the R<sub>1</sub>-D<sub>1</sub> fragment (nucleotide 2521-3332) together with that of the other fragments to a total of 9200 nucleotides (see Fig. 1).

RESULTS AND DISCUSSION

Fig. 2 presents the complete nucleotide sequence of a 9200 bp segment of the maxi-circle of *Trypanosoma brucei* (see also Fig. 1). Begin and end-point of a number of genes and unassigned reading frames are indicated. These were obtained by translating the nucleotide sequence into aminoacids with a genetic code in which only the assignment for UGA (encoding tryptophan in most mitochondrial genetic systems, including

Downloaded from https://academic.oup.com/nar/article/12/1/917/3271040247 by guest on 24 April 2024

Table 1 Mitochondrial genes and URFs on a 9.2 kb maxi-circle segment

|        | nucleotide coordinates<br>of reading frame<br>5' — 3' | 1st AUG at codon position |
|--------|-------------------------------------------------------|---------------------------|
| URF-4* | 938--401                                              | 121                       |
| coxII  | 1971-2599                                             | 2                         |
| URF-5  | 1985-1029                                             | 145                       |
| URF-6  | 2638-3678                                             | 142                       |
| coxI   | 5322-3675                                             | 36                        |
| URF-7  | 5252-5638                                             | -                         |
| URF-8  | 5637-6956                                             | 4                         |
| URF-9  | 7519-6938                                             | -                         |
| URF-10 | 7353-9125                                             | 2                         |

\* 401 nucleotides at the 3'-end of this URF have been published in ref. 7

trypanosomes; 7) differs from the universal code. The genes and URFs found, together with their coordinates in the sequence of Fig. 2 and the position of the first AUG-codon, are listed in Table 1. The gene for cytochrome c oxidase subunit II (coxII) and the URFs 6, 7, 8 and 10 run clockwise, the gene for cytochrome c oxidase subunit I (coxI) and the other URFs, counterclockwise (see also Fig. 6). An extensive discussion of some of the characteristics of the genes and URFs is given below.

#### The genes for cytochrome c oxidase subunits I and II

The aminoacid sequence of the T. brucei coxI and coxII genes is given in Fig. 3 in a comparison to the analogous genes in yeast and human mtDNA. The coxI gene shows an overall homology with the yeast and human genes of 38%, the coxII gene of 25% assuming a limited number of insertions/deletions. This is consistent with the pattern also observed for the rRNA genes (6) and the apocytochrome b gene (7), which also show a rather low degree of direct conservation. There can be no doubt, however, that we are dealing with the coxI and coxII genes, since many of the aminoacid substitutions are conservative, which results in very similar hydrophobicity profiles for the T. brucei and yeast/human gene versions (plots not shown). Furthermore, some of the putatively functional aminoacids are conserved: e.g. in mammalian coxII, His<sub>109</sub>, Cys<sub>208</sub>, His<sub>216</sub> and Met<sub>219</sub> (the coordinates used are those from Fig. 3)

Cytochrome c oxidase subunit I

|     |            |            |              |             |            |             |            |            |  |
|-----|------------|------------|--------------|-------------|------------|-------------|------------|------------|--|
| 1   | MFLCLVCLSL | VSHQMLGICY | LLVAILEGFI   | GYIYSLFIRL  | ELSLIGCGVL | FGDYQFYNVL  | ITSGLIMWF  | AFIMFIMGQ  |  |
|     | * * * * *  | * * * * *  | * * * * *    | * * * * *   | * * * * *  | * * * * *   | * * * * *  | * * * * *  |  |
|     | -MFADRWLFS | TNKHDIQTLY | LLFGAWACVL   | GTALLSLIRA  | ELGQPG-NL  | LGNDHIYNNI  | VTAHAFVMIF | FMWPMIMGG  |  |
|     | * * * * *  | * * * * *  | * * * * *    | * * * * *   | * * * * *  | * * * * *   | * * * * *  | * * * * *  |  |
|     | --MVQKWLVS | TNAKDIAVLV | FMLAIFSQHA   | GTAMSLIIRL  | ELAAPGSQYL | EGNSQLFNVL  | VVGHAVLMTF | FLVMPALIGG |  |
| 81  | FTNYFAPVMV | GFFDMVFPII | NMNSFWMIFG   | FGCLVSGFL   | TEEGMGVQWT | LYPTLICIDF  | HSSLACDFII | FSVHFLGISS |  |
|     | * * * * *  | * * * * *  | * * * * *    | * * * * *   | * * * * *  | * * * * *   | * * * * *  | * * * * *  |  |
|     | FGHWLVPLMI | GAPDMAFPEM | NMNSFWLLPP   | LSLLLLASAM  | VEAGAGTQWT | VYPLPLAGNYS | HPGASVDLTI | FSLHLGAVSS |  |
|     | * * * * *  | * * * * *  | * * * * *    | * * * * *   | * * * * *  | * * * * *   | * * * * *  | * * * * *  |  |
|     | FGNYLLPLMI | GATDTAFPRI | NNIAFWVLFM   | GLVCLVTSTL  | VESGAGTQWT | VYPLPLSIQA  | HSGPSVDLAI | FALHLTSSIS |  |
| 161 | ILNSINVVGT | IFCRRRKYFS | FLIWTFLWQ    | ALLTSLILLI  | TLPVLAGCVT | LLCLDRNFMT  | SFYDVVGGGD | LVLQHLFWF  |  |
|     | * * * * *  | * * * * *  | * * * * *    | * * * * *   | * * * * *  | * * * * *   | * * * * *  | * * * * *  |  |
|     | ILGAINFITT | IINMKPPAMT | QYQFLPFWWS   | VLITAVLLLL  | SLPVLAAGIT | MLLTDRNFMT  | TFPDPACGGD | PILYQHLFWF |  |
|     | * * * * *  | * * * * *  | * * * * *    | * * * * *   | * * * * *  | * * * * *   | * * * * *  | * * * * *  |  |
|     | LLGAINFLVT | TLMNRNMGMT | MGKPLFWWS    | IFITAFLLLL  | SLPVLASGIT | MLLLDRNFMT  | SFFEVAAGGD | PILYEHFWF  |  |
| 241 | FGHPEVYIII | LPVFGVSTI  | IEVTS-PRCV   | FSSVAMIYSH  | LLISVLGMFV | WAHDMFVYGM  | DVDSRATFGS | ITVLIQLPTC |  |
|     | * * * * *  | * * * * *  | * * * * *    | * * * * *   | * * * * *  | * * * * *   | * * * * *  | * * * * *  |  |
|     | FGHPEVYILI | LPFGQMSIHI | VITYSGKPEF   | FCYMGVWAM   | MSIGFLGPIV | WAHDMFVYGM  | DVDTRATFTS | ATMIIATPTG |  |
|     | * * * * *  | * * * * *  | * * * * *    | * * * * *   | * * * * *  | * * * * *   | * * * * *  | * * * * *  |  |
|     | FGHPEVYILI | LPFGCISHSV | VSTYS-KKPV   | FCGISMVYAM  | ASIGLLGFLV | WSHDMYVGL   | DADTRATFTS | ATMIIATPTG |  |
| 321 | IKLFNWIYSP | LFTDMCICFE | IYFIYFIML    | FLAGGLTGLF  | LSNVGIDILM | HDTYVVAHF   | HVYLSLGAUV | GVFGFFHFL  |  |
|     | * * * * *  | * * * * *  | * * * * *    | * * * * *   | * * * * *  | * * * * *   | * * * * *  | * * * * *  |  |
|     | VKVFSLVATL | HGSNMKWSAA | VLWALGFIFL   | FTVGGLTGIV  | LANSSLDLVL | HDTYVVAHF   | HVYLSLGAUV | AIMGCFIHF  |  |
|     | * * * * *  | * * * * *  | * * * * *    | * * * * *   | * * * * *  | * * * * *   | * * * * *  | * * * * *  |  |
|     | IKVFSVATL  | YGSIRLATP  | MLYAIAPFLP   | FTMGGLTGVA  | LANASLDVAF | HDTYVVGHF   | YTVLSHGAIF | SIFAGYTTWS |  |
| 401 | MKWIPIELHT | FWLFFFISSL | WFSNMVFFPP   | LRSLQMFAPP  | BRISDYPISF | LFWSAFTLYG  | M-LLLTPF   | VIFCCCLFWV |  |
|     | * * * * *  | * * * * *  | * * * * *    | * * * * *   | * * * * *  | * * * * *   | * * * * *  | * * * * *  |  |
|     | PLFSGYTLQD | TYAKIHFTIM | FLQVNLTFYP   | QFLPLGSLMP  | BRYSDYDDAY | TTWNILSSVG  | SFISLVAVML | MIF-----   |  |
|     | * * * * *  | * * * * *  | * * * * *    | * * * * *   | * * * * *  | * * * * *   | * * * * *  | * * * * *  |  |
|     | PQILGLNYNE | KLAIQFWLI  | FIGARVIFPP   | MHPLGIGNMP  | RRIPDYDDAF | AGWNYVASIG  | SFIATLSLPL | FIYILYDQLV |  |
| 481 | -----      | -----ILF   | WDYCLFFINL   | FT-YSLSIF   | YFYTVVPCVM | AIYLLVIDFA  | HIILDYLLII | LCFCVFVYIF |  |
|     | -----NIW   | EAFASKRKVL | MVE-----     | -----EPMNLE | WLYGCPPTTH | TFEPEVYMKS  | -----      | -----      |  |
|     | * * * * *  | * * * * *  | * * * * *    | * * * * *   | * * * * *  | * * * * *   | * * * * *  | * * * * *  |  |
|     | NGLNNKVNK  | SVIYAKAPDF | -VESNTIFWL   | MTVKSSSIEF  | LL-TSPPAVH | SFMTPAVQS-  | -----      | -----      |  |
| 561 | FWQAFLLFFY | I          | T.brucei     |             |            |             |            |            |  |
|     | -----      | -          | human        |             |            |             |            |            |  |
|     | -----      | -          | S.cerevisiae |             |            |             |            |            |  |

Cytochrome c oxidase subunit II

|     |            |            |            |            |            |             |            |            |              |
|-----|------------|------------|------------|------------|------------|-------------|------------|------------|--------------|
| 1   | MSFILTWMI  | FLMDSIIVLI | SFSIFLSVMI | ---CALIAT  | VLTVTKINNI | Y---CTWD    | FISSKFI-DT | VYVFLQMPFI |              |
|     | * * * * *  | * * * * *  | * * * * *  | * * * * *  | * * * * *  | * * * * *   | * * * * *  | * * * * *  |              |
|     | ---MAHAQQ  | GLQDATSPIM | EELITPHDHA | LMIIFLICFL | VLYALFLTLT | T---KLNT    | HISDAQDET  | VNTILPAIIL |              |
|     | * * * * *  | * * * * *  | * * * * *  | * * * * *  | * * * * *  | * * * * *   | * * * * *  | * * * * *  |              |
|     | MNDVPTPYAC | YFQDATPQW  | EGILELHDNI | MFYLLVILGL | VSMMLYTIYM | TTSKNFIATK  | YIKHQGTIEV | INTIFPAVIL |              |
| 81  | LCLLLRLCLL | LYFSCINPVS | FDLCKVIGFQ | WYVYFLF--  | ---GETTIF  | -SNLILES DY | LIGDLRILQC | NHVLTLLSLV |              |
|     | * * * * *  | * * * * *  | * * * * *  | * * * * *  | * * * * *  | * * * * *   | * * * * *  | * * * * *  |              |
|     | VLIALLPLRI | LYMTEVDNPD | SLTIKSIQHQ | WYWTYETDY  | ---GCLIF   | NSYMLPPLFL  | EPGDLRLLDV | DNRVVLPIEA |              |
|     | * * * * *  | * * * * *  | * * * * *  | * * * * *  | * * * * *  | * * * * *   | * * * * *  | * * * * *  |              |
|     | LIIAPPSFIL | LYLCDEVISP | AMTKAIGYQ  | WYWKYYSDF  | INDSGETVEF | ESYVIPDELL  | EEQQLRLDIT | DTSMVVVDIT |              |
| 161 | IYKLVSVAVD | VIHSPTISSL | GIKVEN-PCR | CNEIILPATN | NATLYGQCSE | LCGVLHGFMF  | IVIRFI---- | -----      | T.brucei     |
|     | * * * * *  | * * * * *  | * * * * *  | * * * * *  | * * * * *  | * * * * *   | * * * * *  | * * * * *  |              |
|     | PIRMHITSQD | VLHSAVPTL  | GLKTDIAPGR | LNQTTTATR  | PGVYGCQCE  | ICGANHSPMP  | IVLELIPKI  | FEMGPVFTL  | human        |
|     | * * * * *  | * * * * *  | * * * * *  | * * * * *  | * * * * *  | * * * * *   | * * * * *  | * * * * *  |              |
|     | HIRFVVTAAD | VIHDAIPSL  | GIKVDATPGR | LNQVSALIQ  | EGVYGCACSE | LCGTGHANMP  | IKIEAVSLPK | FLEWLNEQ-  | S.cerevisiae |

Figure 3

Sequence comparison between *coxI* and *II* genes. The cytochrome *c* oxidase I and II genes were lined up with the analogous genes from human (18) and *S. cerevisiae* (yeast) mtDNA (19,20). \* indicates homology with the *T. brucei* sequence, - indicates the position at which a deletion is assumed. The gene sequence is presented starting with the first methionine (see Table 1). a and b in the *coxI* sequence indicate proposed intronic sequences in yeast *coxI* (19).

may serve as ligands for Cu binding (27): only His<sub>109</sub> is not conserved in T. brucei. Also a stretch of aromatic aminoacids around position 112 with a possible function as transmembrane electron channel (28) is present in T. brucei. Moreover, the proposed sites for O<sub>2</sub>-binding (position 234-249) and heme a<sub>3</sub> attachment (371-382) of the coxI subunit (29) are almost completely conserved in T. brucei. However, only 42 out of 94 invariant residues in human and yeast coxII and 159 out of 250 invariant residues in coxI of 5 species (29) are present in T. brucei. We anticipate, therefore, that it will be instructive to closely inspect the T. brucei mitochondrial protein sequences in order to acquire more information on the composition of the functional domains of the proteins of the respiratory chain.

Two stretches of 21 and 45 nucleotides, respectively, at the 3'-end of the yeast coxI gene were assumed to be introns to minimize the size difference between the yeast and human version of the protein (19). We find, however, 4 identical aminoacids in the T. brucei sequence and the larger yeast "intron". We have, therefore, not omitted these residues from the sequence alignment (see Fig. 3). In view of the low degree of conservation in the aminoacid sequence at the C-terminus of coxI (29), it cannot be excluded that rather large variations in size in this part of the protein are allowed.

#### The genetic code; the coxI and coxII genes display a high cysteine content

A striking feature of the sequences as presented in Fig. 3 is the relatively high content of cysteine residues in the T. brucei coxI and coxII genes (e.g. 22 cysteine residues in T. brucei and only 1 in human coxI). Moreover, the apocytochrome b gene and some of the URFs (see below, Fig. 5) show the same phenomenon. Since cysteine is both structurally and functionally an important aminoacid, it is somewhat surprising to see such large differences in cysteine content between analogous proteins in different organisms. The question arises, therefore, whether the UGU and/or UGC triplets, which specify cysteine in the standard code, have a different assignment in the T. brucei mitochondrial genetic system. We have checked for this reason whether the alignments as shown in Fig. 3 and in ref. 7 allow an unusual assignment for UGU and UGC. We have also included in this study some other codons of which the assignment deviates in various mitochondrial genetic systems: UGA, AGA, AGG, AUA, AUU and the CUN family (see refs. 7 and 30 for a more extensive discussion).

On the basis of previous sequence analysis of trypanosomal mtDNA



Table 2 The genetic code in *T. brucei* mitochondria

| Codon | Number | Aligned with aminoacid              | H    |      | Y    |      |
|-------|--------|-------------------------------------|------|------|------|------|
|       |        |                                     | A(%) | B(%) | A(%) | B(%) |
| AUA   | 71     | Ile                                 | 30   | 8.5  | 24   | 9.9  |
|       |        | Leu + Val                           | 30   | 18.7 | 25   | 19.6 |
|       |        | Met                                 | 5.6  | 4.9  | 4.2  | 3.9  |
| AUU   | 49     | Ile                                 | 25   | 8.5  | 27   | 9.9  |
|       |        | Leu + Val                           | 29   | 18.7 | 33   | 19.6 |
|       |        | Met                                 | 2.1  | 4.9  | 2.1  | 3.9  |
| AGA   | 13     | Arg                                 | 62   | 1.8  | 69   | 2.0  |
|       |        | Lys                                 | 23   | 1.8  | 15.4 | 2.0  |
|       |        | Ser                                 | 7.7  | 6.1  | 0    | 7.2  |
| AGG   | 4      | Arg                                 | 25   | 1.8  | 25   | 2.0  |
| UGU   | 38     | random with 17 different aminoacids |      |      |      |      |
| UGC   | 9      | random with 9 different aminoacids  |      |      |      |      |

The data were compiled from the gene for apocytochrome b (7), *coxI* and *coxII*. Comparison was made with human (H) and yeast (Y) mitochondrial gene sequences (18-20,24). The frequency A at which *T. brucei* mitochondrial gene codons line up with a certain aminoacid in the human and yeast mitochondrial protein sequences is given compared to the frequency B at which that particular aminoacid occurs in those sequences.

(7), we were able to assign UGA and the CUN codon family to tryptophan and leucine, respectively. This assignment is confirmed by data derived from the *coxI* and *II* genes.

The data for the other codons are presented in Table 2: No consistent pattern could be observed in the alignment of human and yeast *coxI*, *coxII* and apocytochrome b aminoacids with *T. brucei* UGC and UGU codons. The residues found more or less reflect the composition of the proteins studied. Furthermore, two cysteine residues conserved in human and yeast *coxII* are also encoded by UGU. The high cysteine content may therefore be a real feature of trypanosomal mitochondrially encoded proteins. This raises the intriguing question how oxidation of these proteins is prevented, particularly in the case of *coxI*, which contains the oxygen binding site of the cytochrome c oxidase complex (see ref. 29).

Also the assignment for the AUA/AUU and AGA/AGG codons does not deviate from the universal code in trypanosome mitochondria. AUA/AUU line up predominantly with isoleucine (and closely related aminoacids such as leucine and valine), and not with methionine, which is specified

by these codons in mammalian (18) and insect mitochondria (31), AGA clearly codes for arginine and not for a stop (as in mammals) or for serine (as in insects). The assignment for AGG is less firm, due to the low number of AGG codons in the genes studied so far, but also in this case the universal code appears to be followed.

The gene for cytochrome c oxidase subunit II contains a -1 frameshift

The nucleotide sequence as presented in Fig. 2 indicates that the reading frame for the coxII gene is not continuous: a -1 frameshift has to be introduced to link the C-terminal 39 aminoacid residues to the N-terminal moiety of the protein. This shift should occur in a rather small area (around residue 188, the arrow in Fig. 3) as judged from the position of large homology blocks that flank this residue on either side in the two different frames. Repeated sequence analysis in two directions, also including the use of ITP to reduce compression of bands, with clones from different banks prepared with different batches of maxi-circle DNA confirms the sequence, which virtually rules out possible chance of sequence errors and trivial cloning artifacts (results not shown).

The DNA used in this study, however, is mtDNA from the bloodstream form of T. brucei 427, a strain that has been cultivated with the use of laboratory animals ever since its isolation from sheep, approximately 10 years ago. A functional respiratory chain and Krebs cycle are absent from bloodstream T. brucei (32) and it is conceivable that a silencing mutation in the coxII gene could have occurred. We have performed, therefore, sequence analysis of the coxII region of the maxi-circle of cultured T. brucei 427, in which the respiratory chain is fully operative (32). The result of such an analysis is shown in Fig. 4, which gives the sequence of the relevant area flanked by a stop codon in either frame. Both the sequences shown (A, standard procedure, B, procedure with ITP) perfectly match that of Fig. 2. Moreover, a similar analysis of the sequence of the opposite DNA strand and of other areas from the D<sub>1</sub>-R<sub>2</sub> fragment (to a total of about 1650 nucleotides) did not reveal any difference with the sequence as given in Fig. 2. The gene for cytochrome c oxidase subunit II, therefore, is also discontinuous in respiring trypanosomes. In order to explain this phenomenon, a number of possibilities might be considered:

1) The coxII gene is a pseudo gene, whose function has been taken over by a copy residing in the nucleus. We consider this unlikely since

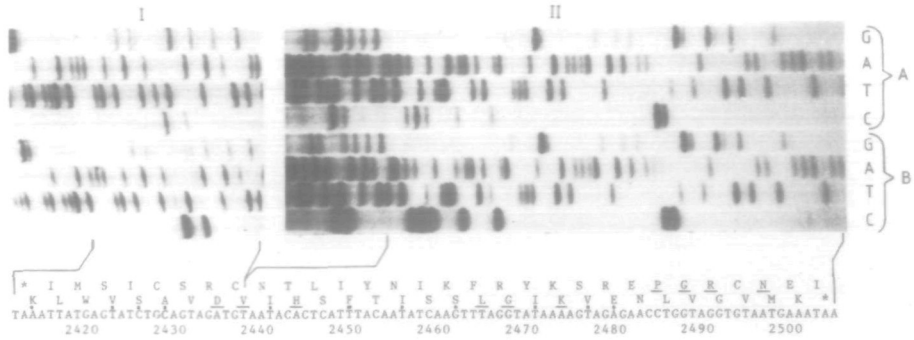

**Figure 4**

Nucleotide sequence of part of the cytochrome *c* oxidase subunit II gene from cultured *T. brucei* 427. M13 mp9 DNA containing the  $D_1-R_2$  insert was submitted to sequence analysis utilizing a synthetic oligonucleotide primer. The figure shows relevant parts of an autoradiogram of a 2 hr (II) and a 3½ hr (I) run of a sequence reaction mixture obtained from  $D_1-R_2$  in mp9 primed with 5'-CCA.CAC.AAT.TCA.CTA.CAT.TG-3'. This oligonucleotide is complementary to nucleotides 2540-2559 of the sequence of Fig. 2 (which correspond to residues 197-202 of the amino acid sequence of Fig. 3). The reactions were performed under standard conditions (A) or with replacement of GTP by ITP (B). The obtained nucleotide sequence is outlined underneath the autoradiogram together with the amino acid sequence in two different reading frames. Amino acids which occur at the analogous position of both yeast and human coxII are underlined, whereas conservative amino acid substitutions are dotted.

no cross-hybridizing bands appear on blots of restriction digests of nuclear DNA from dyskinetoplastic trypanosomes which do not have maxi-circles (such as *T. evansi*, see ref. 33). Similar experiments with *T. brucei* nuclear DNA reveal no bands other than those attributable to contaminating maxi-circle DNA (results not shown).

2) Cytochrome *c* oxidase is dispensable also in cultured *T. brucei*. A branched electron transport system with cytochromes  $a_3$  and  $o$  as independent alternative oxidases has been proposed for kinetoplastida such as *T. mega* (34) and *C. fasciculata* (35). Evidence of cyanide insensitive terminal oxidases has also been obtained in cultured *T. brucei* (36). The possibility exists, therefore, that in cultured trypanosomes electron transfer to oxygen can proceed, at least to some extent, without the involvement of cytochrome *c* oxidase. The inactivation of this oxidase in the *T. brucei* strain studied, however, must have been a very recent event, as judged from the fact that the mitochondrial encoded cox genes are still highly conserved and only one apparent gene silencing mutation has occurred. Most likely, such a  $cox^-$  strain would no longer be viable

**A** T.brucel URF5

```

1  -YKTEHLLER LDICILIVF ILVLSVLCY VSLCEKILA IVQFRIGPAL -FLVGLLTP I DGVKLVFVY TLFVIGVDSI
    ****          ***          *          *          *          *          *          *          *
MMHAKHLLLI ---VPIILAMA FL----- -MLTEKIKLG YNQLRKGPHV VGPTQLLQPF ADANKLPTKE FL---KPAFST
81  LFSSLLPITA FCFIIFWFFV PLGFIILFK -GFTLLFLG FHLFSDVFCI FVCGCLFSS CFYLAAMKT LPTFSLSECS
    *          *          *          *          *          *          *          *          *
ITLYITAPFL ALTIALLLMT PLFPHMPLW LNLGLLPIA -TSSLAVTSI LNSWASNSH YALIGALRAV AQTISVEVTL
161  ILILLYCIYI LDVYCFQIK DICISQMLQ MCFILGLLFI CLFWIGLLD GLLPFDYDE CSELVAGLV TEL---SGI
    *          *          *          *          *          *          *          *          *
AIIILLSTLM SCSFHLSTLI ---TQERLM LLLPSVPLM MFI-SLAR TERTFVLAE GSELVAGLV IETAACFPAL
241  FVIVYSVLEI MHLITLILF SCLCPGLFI CFESI----- -LILILGLI FVVICLKKI T-----TAQT FILLFLPFG
    *          *          *          *          *          *          *          *          *
FMAETWII MHTLITLIF LGTTVDLSP ELTITVPTK TALLTSLPLW INATYPRFK DQHLWLNWV PLPLTLALLM
321  FVNSPIAIT KIICILF T.brucel URF-5
    *          *          *          *          *          *          *          *          *
WVNSPITIS SIPPQT- human URF-1

```

T.brucel URF8

```

1  -SMAQGLI----- -WLI CINPILLIV IIVYI-NYS FCIQIKNVV YVYIYVYIS LNVVFNACII
    ****          *          *          *          *          *          *          *
PKPTKMLKLI VPTIMLLPLT WLSKQHWI WTTTSLIIS IIPLFFMQI KDFVSCSPT FSDPLITPL LMLTIVLPL
81  MYILPFLSK KCVSYMKYF IVHYIYVI NVVLIHILD FMCPLAFES LFFPICLVEL FVYKDFIF AITFLIIFSS
    *          *          *          *          *          *          *          *          *
TIMASQHLN SFLSSEKLY LKGLISLQIS LDMPTATEL IM-FTIFPKI TLITPLAIIT EHCQKPELIS ACTVFLPITL
161  VSGVVCIIIC IIVISEFNI ELQAFIDVQY FDLYSDFI WILFLM-FA IKTPIWFFV WLPKHVYVW TEMVLLASI
    *          *          *          *          *          *          *          *          *
VCSPLLIAL INTENTLGL MULLTLTAQ KLSHWANGL MGLATMAMV WQPLVGLR WLPKAVIAP IAGSVLAAV
241  VLEIGVQVY KPLIAPWTI SIMVGLIDS VIVLGLVFA MHLIFL-SD YKILAWYI IH-TCGLIL LWNIDILVQ
    *          *          *          *          *          *          *          *          *
LLELGGTGM RLTLIMLPLI RMAATPL- VLSLM-QHM TSSICLRQD LESLLAYSI SMLAVYAI LIQTPWSTC
321  LLILCHLASH LSSSPKIVI CNYDNTQVA IPILLISVF- GISWNSLPL CLFPLWDFP FHLFVYDIF ILTGLISIF
    *          *          *          *          *          *          *          *          *
AVIL-MIASC LTSLLFLCA HSWYKTRSA IMILSQLOQ LPLMAMVWL LASLAKLAL PFIHLGELS VLVTFVSWH
401  IYIHSFYIT LTIPLSIIY TMLSTFVW WDKYLRLOV SINDIYVPS ISISTVIFY FYILLI----- T.brucel URF8
    *          *          *          *          *          *          *          *          *
ITLLITGLM LVYALTSYH FITTWCGLT RHIDKQSP TRENTLWYS LSPILLSLM PDIITGSSC Human URF4

```

T.brucel URF10

```

1  ---DMLIF FLFFIMQVI SCSFQPCR- NPLSPWLSV MIIIVLQNI PSLMVSCL YCYTDFCL IMGLDFVIV
    *          *          *          *          *          *          *          *          *
MDSMTNTL TLTSLLPIL TILVWPKM STPYVKSIV ASTVILS-L FPTDFNCLD QEVIIHNSW ATTQTLQL
81  LTYVCSGM FIMLLIMVF CFIVFAFTI MYFNLGDF LIIFWVVC MSLFSLSDY LEATQWELL CLFSFLISY
    *          *          *          *          *          *          *          *          *
SFLDYTPM FIPVAL-FVT WSDHEFSIM MRSDFWIKQ FYLLIFLIT MLIIVTAGL PQLPQVQV CIMSFLISW
161  FVWFPALEP GFAFFICKI GVDLIFAPS IIFL-SMFC MTPYFLFF ODTYTIKPS ICLVQCAFT ESTQGLRIV
    *          *          *          *          *          *          *          *          *
WYARADANTA AIQALYERI GQIFLALA VFILSSWD PQMALL- ---AKSLTP LGLLLAAG KBAQGLRIV
241  LPMNSGPIF VVALIRAAFL VYQIILSY VYWCDFVPS FYVHLGWSI LILILMT- -LQVYVWD VKRYVAFSTI
    *          *          *          *          *          *          *          *          *
LPSAECPTP VVALLESIM VVAGIFLIR FPLAENSF- ---LIQTL LCLGATTLF AAVCALTWD IKKIVAFST
321  QPSISPGCC LCIDYIGSI FFCYDFPFA TLFIVLQVI HFFCLQDLR CYFFWVCC VBARLLIFA ILSGSIWVL
    *          *          *          *          *          *          *          *          *
SQLGLQVYI CINQFLAFL HICTRAFFIA MFWCSGSI HMLNQQIIR KAGCLLQNF LTSTLTI-C SLAAGMPL
401  GCFYCKMLL ALLMLSPYI IEFVIRII FIFPDMYV FLFPLWVY KCFVDCVLF LFDYECCLV YGLIS---L
    *          *          *          *          *          *          *          *          *
TQVSKDHI E-TAMHSTH AWAL---SIT LIATSLTAY STMILLTL GQRPPTLTM IREOHTPLN PIKLAAGSL
481  YHCILSIFPI IDVCFIVS STCVNSPFL NFDYFDIAI FVVFLISVC FLYTCLPFI FVNDICMLF WRIFVVIIL
    *          *          *          *          *          *          *          *          *
FAGLITQYI SPASFPQTI PLYLKTALA VYFLGLTAL DMLTWKIK KESPLC-IFY FSNGLQVPS IHTIYPTLC
561  VVNFVQVY FVCHIFKLI FVWFVITYE YMLKYCLFC ILWILV- - - - - T.brucel URF10
    *          *          *          *          *          *          *          *          *
LLSQMLPL LLDLWLEKL LKFTISQRI STSIIITSQK QHILYFLS FPLILTLI IT Human URF5

```

Downloaded from https://academic.oup.com/nar/article/12/1/917/3271040247 by guest on 24 April 2024

**B**

T. brucei URF4

```

1  TPQKSLFLYI  IRIFIFLIYY  SFIIICDITF  LTLLSFDLLW  LLIIMLFWIT  LLSYICFIF  ILLFLFCPTL  FFCFLSPDR
81  FLFIIIIIQY  IIFIFLIFIN  HIIIIISILF  IFSLLLFLLL  HSSRFCKIL  VLVYTHMLL  IMFILLFILL  YFMILNCFY
161  LCDPFCFLVD  EDMLGICLFL  YTLIIILFEL  IAPLILFMEQ  LYIILGVFIF  IYKLTFFYLF  CFILIIILIS  FIFYIILFK
241  LLLFQSCTCV  LIGLMSFAIV  SLLFVLSVMW  FCFILFIFIS  TQNTIFTLV  NPHLITSISL  VLLIIIIYFF  IIVYIFDFYI
321  KENTYFLIKFI  FFSFMMFLI  SLLLACLFLC  IGAIFIVFGF  FIKVFCLLLQ  LSTLCICIGF  FFIIMLIHYY  IFYFRLIVMI
401  FIFSTQPLGF  WVKLSFIMI  KMLLFFICSS  VYILFFDIIN  LFDLIL
    
```

T. brucei URF6

```

1  DWLWLSRVFD  LLCIRTDFI  LWFELDPL  YDFVDFVVC  IYFIFIVLGC  FFIIRIFSPV  FVLLIFTFGC  ICSLTMLPTG
81  YIYIYIYILY  NFICFFFAFC  INFLIYYIEF  FIFITRHIFF  DFISFSNVIY  NYFGILDQFN  VMFCAYLFLC  FYFVIYFLFC
161  FIFPVIRCLF  IVIMDFLFFN  FDIIVSILLC  DIVYLDIISL  LLLYFPIFM  FIYGFPSFVI  ILGLLPLLLF  LVIMLFFGPT
241  FLVYGIQIIL  LTVYVLYMI  TBSRCTILMP  AILIFFKFIY  FQVYFVYVFI  LILPFIISFFS  FFLKDFLFLS  LYDFDFGSLY
321  NYDILSTSYF  YIQWQFCFL  QLLSIYI
    
```

T. brucei URF7

```

1  QLEDMKQGF  YEKHLSTQDI  EKFYKTKIK  IKLFLMNYK  KFNQPLPL  FYKPHTFSP  KTPQSNPSI  SSSSEKPMFK
81  SPFLSPINFP  FLIDQSQML  KPLFKYTKI  TINYKEIYR  KHOKIKLE
    
```

T. brucei URF9

```

1  FYKHTDTIKK  LMIHNTINI  LIITKQKLA  KFLPWINEPD  INPHIEMEK  NIKHISTSKI  SSKRCFFM  KGFYFPLSPV
81  MSPFLPFIQ  KLSVCSGWA  RTALSLQSH  ENPRLPLVC  YQICIDPFR  KIQSGGEGE  ESRCEQSPV  GFTICLGMG
161  DQVGEKFW  CGITGEGEI  CLYITTYIM  KYIK
    
```

**Figure 5**

A) Sequence comparison between T. brucei URF5 and human URF1, T. brucei URF8 and human URF4 and T. brucei URF10 and human URF5. The human sequences are from ref 18. The first methionine is underlined in the T. brucei sequences. For further details, see legend to Fig. 3.

B) Amino acid sequence of T. brucei URF4, 6, 7 and 9. The first methionine is underlined.

outside the laboratory and only capable of growing in rich culture media.

Sequence analysis of maxi-circles from recently isolated T. brucei stocks should shed further light on this possibility.

3) The mitochondrial translational machinery is capable of a -1 frame-shift with a frequency high enough for the production of sufficient cytochrome c oxidase subunit II. Such frame-shifts have been postulated to occur as an essential step in the synthesis of proteins produced in low amounts, such as the lysis-protein in the coli-phage MS2 (37) or to explain the leaky phenotype of a yeast mutant (38). In the latter case the frameshift was tentatively attributed to the unique structure of the yeast mitochondrial tRNA<sup>phe</sup>. As yet, we have not identified any mitochondrial tRNA genes and we do not know how such a mechanism could operate in T. brucei mitochondria without severely affecting the translation of continuous genes.

4) The mRNA for coxII contains a continuous reading frame as a result of a small splice in the appropriate area of precursor RNA. This

may be a real possibility, in spite of the lack of splices in other T. brucei mitochondrial genes and the lack of precedence for such small splices in (mt)mRNA. Two major RNA-species map in the coxII area (10). Efforts to directly obtain the RNA sequence with the aid of synthetic primers have been hampered so far by the low concentration of these mRNAs in total RNA preparations from T. brucei and attempts to enrich these RNAs by isolation of mitochondria have resulted in extensive degradation. We are currently screening a cDNA clone bank in order to obtain and sequence a coxII-derived cDNA.

The unassigned reading frames

The aminoacid sequence of the unassigned reading frames is given in Fig. 5. Three of them show a low, but distinct homology (20% at the aminoacid level) with mammalian mitochondrial URFs: T. brucei URF5, 8 and 10, and mammalian URF1, 4 and 5 respectively (Fig. 5A). This again follows the pattern that trypanosomal mitochondrial genes are less well conserved, than what is usually encountered (compare e.g. the homology between human and insect URF5: 32%; 31). However, the trypanosomal and corresponding mammalian URFs are of virtually identical size and the hydrophobicity profiles are strikingly similar (not shown), albeit that the T. brucei URFs are slightly more hydrophobic. It is very likely, therefore, that we are dealing with analogous URFs. The first AUG-codon in trypanosomal URFs 4, 5 and 6 occurs rather late in the sequence (around codon 120-140, see Fig. 5 A,B and Table 1). Although this could simply indicate that the proteins start at these positions, sequence alignment of trypanosomal URF5 and human URF1 reveals that the major part of the homologous aminoacids is found upstream of position 148, at which the first AUG codon occurs (Fig. 5A). We have checked the sequence of the 5' half of this gene in a fashion similar to that described for the coxII gene: the same sequence was found in a large number of M13 clones derived both from bloodstream form and cultured T. brucei 427. Therefore, explanations such as sequencing errors, cloning artifacts and/or this gene being a pseudo-gene are unlikely. Although AUA and AUU apparently do not code for methionine (see Table 2), some other unusual codon usage can be envisaged. Close inspection of the 5' sequences of URF4, 5 and 6 reveals the presence of an UUG codon at position 6, 5 and 5, respectively. In URF5 this is, in fact, the only UUG codon of the gene. The possible use of UUG as initiator triplet has been reported for prokaryotes (39). A similar phenomenon may occur in trypanosome mitochondria.

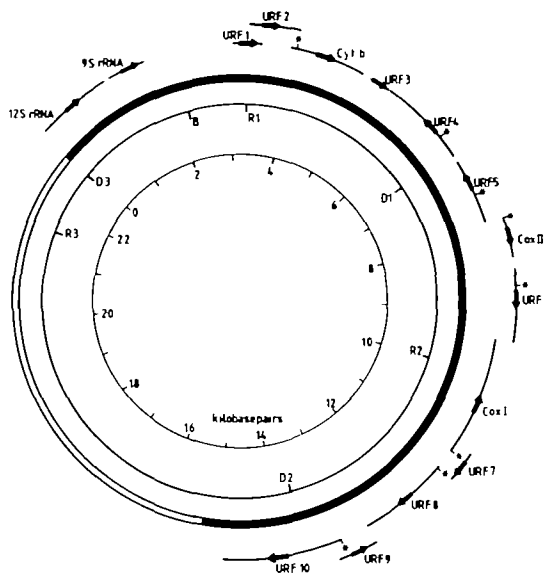

**Figure 6**

Partial gene map of *T. brucei* maxi-circle DNA. The arrangement of genes is derived from various studies (6,7,10 and the present data). Arrows indicate direction of transcription of each gene. The black bar indicates the sequenced area (B = BamHI). \* indicates the position of the first AUG triplet in each gene.

The URFs discussed so far display the classical amino acid composition of mitochondrial membrane proteins, containing a high percentage of hydrophobic residues (70-80%). URF7 and URF9, however, are rich in polar and basic residues (around 55%). These URFs do not contain AUG codons and UUG triplets are found only towards the 3' end of the sequence of URF9. In 2 previous papers (7,10) other examples of such URFs have been discussed (URF1, 2 and 3). At present, we cannot rule out a protein encoding function for those URFs, since abundant transcripts are mapped in some of the URF areas. However, if the unusual properties of the putative URF-proteins are taken into consideration, it seems more likely that these RNAs have some other, as yet unknown function. In this view, the occurrence of reading frames of this length (e.g. URF9 = 194 amino acids) would be the consequence of constraints imposed on the DNA sequence by the unknown role of the RNA and not by the protein-encoding function.

Gene organization

Figure 6 gives the current state of affairs in the analysis of the gene organization of the T. brucei maxi-circle, based on sequence determination of 15.5 kb (6,7,10, this paper). Comparison with mammalian (18) and insect (31) mitochondrial genomes, which are of similar size and display, between them, a few conserved features (e.g. the order of the rRNA genes and that of the protein genes), reveals a rather unique gene organization in trypanosomes. The order of transcription of the two rRNA genes is reversed: 5'-large rRNA-small rRNA-3', the order of the protein genes is different, coxI being transcribed in a direction opposite to that of the coxII and apocytochrome b genes and tRNA genes are conspicuously absent. In fact, the only point of similarity is the relative position of URF8 and 10: URF4 and 5 in mammalian and insect DNA, which are homologous to these trypanosomal URFs, also occur in tandem in their respective DNAs.

tRNA genes are used as processing points in the expression of mammalian and (possibly) insect mitochondrial genes. Their absence in the sequences obtained so far may be explained in a few alternative ways:

a) tRNAs in trypanosome mitochondria have a highly unusual structure, which allows them to go undetected in a computer analysis looking for classical or semi-classical tRNAs.

b) The genes are clustered in the still unsequenced part of the maxi-circle, or

c) tRNAs are imported, as has been postulated for some of the Tetrahymena mitochondrial tRNAs (40) or are encoded on mini-circles.

We are currently completing the maxi-circle sequence of T. brucei and comparing relevant areas to maxi-circle sequences of the insect trypanosome, Crithidia fasciculata, in order to gain more insight in this intriguing problem. This approach will also be followed to localize the remaining protein genes and URFs and to find out whether some of the unusual features discussed above (the high cysteine content of proteins, the discontinuous coxII gene, the possible use of UUG as initiator codon) are shared by other trypanosomatidae.

ACKNOWLEDGEMENTS

We thank Prof.Dr.P.Borst, Prof.Dr.L.A.Grivell and Dr.H.F.Tabak for their continuing interest, stimulating discussions and critical reading of the manuscript. We are indebted to Dr.A.O.Muijsers for his comments on the coxI and coxII sequences, to Ms G.J.M.Scholts for expert typing, to Mrs F.Fase-Fowler for a kind gift of cultured T. brucei 427 and to



E.Tigchelaar, K.Gravenmeijer and Ms J.van den Burg for skilful technical assistance. We thank J.Bruning for sharing with us his unpublished results on the nucleotide sequence of a cDNA derived from a *coxI* transcript. This work was supported in part by a grant to L.A.Grivell from the Foundation for Fundamental Chemical Research (SON), which is subsidized by The Netherlands Organization for the Advancement of Pure Research (ZWO).

Abbreviations: kb, kilo base pairs; URF, unassigned reading frame; *coxI*(II), cytochrome *c* oxidase subunit I(II); mt, mitochondrial.

+ Present address: Istituto di Anatomia Comparata Biologia Generale, Genetica, Via Romana 17, Firenze, Italy

§To whom correspondence should be addressed

#### REFERENCES

- 1 Simpson, L. (1972) *Intern.Rev.Cytol.* 32, 139-207.
- 2 Borst, P. and Hoeijmakers, J.H.J. (1979) *Plasmid* 2, 20-40.
- 3 Englund, P.T. (1981) in: *Biochemistry and Physiology of Protozoa* (Levandowsky, M. and Hutner, S.H., Eds), 2nd edn, Vol.4, Academic Press, New York, pp. 334-383.
- 4 Stuart, K. (1983) *Mol.Biochem.Parasitol.* 9, 93-104.
- 5 Hoeijmakers, J.H.J., Snijders, A., Janssen, J.W.G. and Borst, P. (1981) *Plasmid* 5, 329-350.
- 6 Eperon, I.C., Janssen, J.W.G., Hoeijmakers, J.H.J. and Borst, P. (1983) *Nucl.Acids Res.* 11, 105-125.
- 7 Benne, R., De Vries, B.F., Van den Burg, J. and Klaver, B. (1983) *Nucl.Acids Res.* 11, 6925-6941.
- 8 Johnson, B.J.B., Hill, G.C., Fox, T.D. and Stuart, K. (1982) *Mol. Biochem.Parasitol.* 5, 381-390.
- 9 Simpson, L., Spithill, T.W. and Simpson, A.M. (1982) *Mol.Biochem. Parasitol.* 6, 253-264.
- 10 Benne, R., Agostinelli, M., De Vries, B.F., Van den Burg, J., Klaver, B. and Borst, P. (1983) in: *Mitochondria 1983: Nucleo-Mitochondrial Interactions* (Schweyen, R.J., Wolf, K. and Kaudewitz, F., Eds), De Gruyter, Berlin, pp. 285-302.
- 11 Woese, C.R., Gutell, R., Gupta, R. and Noller, H.F. (1983) *Microbiol.Rev.* 47, 621-669.
- 12 Noller, H.F., Kop, J.A., Wheaton, V.W., Brosius, J., Gutell, R.R., Kopylov, A.M., Dohme, F. and Winship, H. (1981) *Nucl.Acids Res.* 9, 6167-6189.
- 13 Birnboim, H.C. and Doly, J. (1979) *Nucl.Acids Res.* 7, 1513-1523.
- 14 Borst, P., Fase-Fowler, F., Hoeijmakers, J.H.J. and Frasch, A.C.C. (1980) *Biochim.Biophys.Acta* 610, 197-210.
- 15 Poncz, M., Solowiejczyk, D., Ballantine, M., Schwartz, E. and Surrey, S. (1982) *Proc.Natl.Acad.Sci.U.S.* 79, 4298-4302.
- 16 Van der Marel, G.A., Marugg, J.E., De Vroom, E., Wille, G., Tromp, M., Van Boeckel, C.A.A. and Van Boom, J.H. (1982) *Recl.Trav.Chim. Pays-Bas* 101, 234-241.
- 17 Sanger, F., Nicklen, S. and Coulson, A.R. (1977) *Proc.Natl.Acad. Sci.U.S.* 74, 5463-5467.
- 18 Anderson, S., Bankier, A.T., Barrell, B.G., De Bruijn, M.H.L., Coulson, A.R., Drouin, J., Eperon, I.C., Nierlich, D.P., Roe, B.A.,

- Sanger, F., Schreier, P.H., Smith, A.J.H., Staden, R. and Young, I.G. (1981) *Nature* 290, 457-465.
- 19 Bonitz, S.G., Coruzzi, G., Thalenfeld, B.E., Tzagoloff, A. and Macino, G. (1980) *J.Biol.Chem.* 255, 11927-11941.
- 20 Coruzzi, G. and Tzagoloff, A. (1979) *J.Biol.Chem.* 254, 9324-9330.
- 21 Coruzzi, G., Bonitz, S.G., Thalenfeld, B.E. and Tzagoloff, A. (1981) *J.Biol.Chem.* 256, 12780-12787.
- 22 Fox, T.D. (1979) *Proc.Natl.Acad.Sci.U.S.* 76, 6534-6548.
- 23 Macino, G. and Tzagoloff, A. (1980) *Cell* 20, 507-517.
- 24 Nobrega, F.G. and Tzagoloff, A. (1980) *J.Biol.Chem.* 255, 9828-9837.
- 25 Thalenfeld, B.E. and Tzagoloff, A. (1980) *J.Biol.Chem.* 255, 6173-6180.
- 26 Tzagoloff, A., Nobrega, M., Akai, A. and Macino, G. (1980) *Current Genet.* 2, 149-157.
- 27 Capaldi, R.A., Malatesta, F. and Darley-Usmar, V.M. (1983) *Biochem. Biophys.Acta* 726, 135-148.
- 28 Steffens, G.J. and Buse, G. (1979) *Hoppe-Seyler's Z.Physiol.Chemie* 360, 613-619.
- 29 Welinder, K.G. and Mikkelsen, L. (1983) *FEBS Lett.* 157, 233-239.
- 30 Grivell, L.A. (1983) *Sc.Amer.* 248, 78-89.
- 31 Clary, D.O., Wahleithner, J.A. and Wolstenholme, D.R. (1984) *Nucl. Acids Res.* 12, 3747-3762.
- 32 Opperdoes, F.R. (1977) Ph.D.Thesis, Amsterdam.
- 33 Hoeijmakers, J.H.J. and Weijers, P.J. (1980) *Plasmid* 4, 97-116.
- 34 Ray, S.K. and Cross, G.A.M. (1972) *Nature New Biol.* 237, 174-175.
- 35 Hill, G.C. (1972) in: *Comparative Biochemistry of Parasites* (Van den Bossche, H., Ed), Acad.Press, New York and London, pp. 395-415.
- 36 Evans, D.A. and Brown, R.C. (1972) *J.of Protozool.* 19, 365-369.
- 37 Kastelein, R.A., Remaut, E., Fiers, W. and Van Duin, J. (1982) *Nature* 295, 35-41.
- 38 Fox, T.D. and Weiss-Brummer, B. (1980) *Nature* 288, 60-63.
- 39 Young, I.G., Rogers, B.L., Campbell, H.D., Jaworowski, A. and Shaw, D.C. (1981) *Eur.J.Biochem.* 116, 165-170.
- 40 Suyama, Y. and Hamada, J. (1976) in: *Genetics and Biogenesis of Chloroplasts and Mitochondria* (Bücher, Th., Neupert, W., Sebald, N. and Warner, S., Eds), North-Holland, Amsterdam, pp. 763-770.
